# Supplementary material for: Salvage Radical Prostatectomy for Recurrent Prostate Cancer: A Systematic Review (French ccAFU)
Source: MDPI journal article supplement (doi:10.3390/cancers15225485), 2023-11-20
Supplement: s1 [file s1]

| Study objective                                                                                                       | Number of included retrospective studies fulfilling the criterion |
|-----------------------------------------------------------------------------------------------------------------------|-------------------------------------------------------------------|
| 1. Is the hypothesis/aim/objective of the study stated clearly in the abstract, introduction, or methods section?     | 55/55                                                             |
| <b>Study population</b>                                                                                               |                                                                   |
| 2. Are the characteristics of the participants included in the study described?                                       | 55/55                                                             |
| 3. Were the cases collected in more than one centre?                                                                  | 9/55                                                              |
| 4. Are the eligibility criteria (inclusion and exclusion criteria) for entry into the study explicit and appropriate? | 51/55                                                             |
| 5. Were participants recruited consecutively?                                                                         | 53/55                                                             |
| 6. Did participants enter the study at a similar point in the disease?                                                | 0/55                                                              |
| <b>Intervention and co-intervention</b>                                                                               |                                                                   |
| 7. Was the intervention clearly described in the study?                                                               | 55/55                                                             |
| 8. Were additional interventions (co-interventions) clearly reported in the study?                                    | 0/55                                                              |
| <b>Outcome measure</b>                                                                                                |                                                                   |
| 9. Are the outcome measures clearly defined in the introduction or methods section?                                   | 55/55                                                             |
| 10. Were relevant outcomes appropriately measured with objective and/or subjective methods?                           | 55/55                                                             |

|                                                                                                           |       |
|-----------------------------------------------------------------------------------------------------------|-------|
| 11. Were outcomes measured before and after intervention?                                                 | 55/55 |
| <b>Statistical analysis</b>                                                                               |       |
| 12. Were the statistical tests used to assess the relevant outcomes appropriate?                          | 48/55 |
| <b>Results and conclusions</b>                                                                            |       |
| 13. Was the length of follow-up reported?                                                                 | 51/55 |
| 14. Was the loss to follow-up reported?                                                                   | 0/55  |
| 15. Does the study provide estimates of the random variability in the data analysis of relevant outcomes? | 0/55  |
| 16. Are adverse events reported?                                                                          | 55/55 |
| 17. Are the conclusions of the study supported by results?                                                | 55/55 |
| <b>Competing interests and sources of support</b>                                                         |       |
| 18. Are both competing interests and sources of support for the study reported?                           | 52/55 |

**Table S1:** Risk of bias in non-randomized trials using the ROBINS-I tool
